# Supplementary material for: Photocatalytic hydrogen evolution from water based on Zn–terpyridine 2D coordination nanosheets
Source: Royal Society of Chemistry journal article supplement (doi:10.1039/d2ta05114a), 2022-01-01
Supplement: d2ta05114a1.pdf [file d2ta05114a1.pdf]

## Supplementary Information

### **Photocatalytic hydrogen evolution from water based on Zn-terpyridine 2D coordination nanosheets**

Shuo Xiang, ‡<sup>a</sup> Arshad Khan, ‡<sup>ab</sup> Zeyan Zhou,<sup>a</sup> Bingling He,<sup>a</sup> Xin Wang,<sup>\*c</sup> Binju Wang<sup>d</sup> and Qunhong Weng,<sup>\*a</sup>

<sup>a</sup> College of Materials Science and Engineering, Hunan Joint International Laboratory of Advanced Materials and Technology for Clean Energy, Hunan University, 2 Lushan S Rd, Changsha, 410082 P.R. China

<sup>b</sup> School of Chemistry and Environmental Engineering, Sichuan University of Science & Engineering, Zigong 643000, Sichuan, P. R. China

<sup>c</sup> School of Materials Science and Engineering, Taiyuan University of Technology, Taiyuan 030024, P. R. China

<sup>d</sup> State Key Laboratory of Physical Chemistry of Solid Surfaces, College of Chemistry and Chemical Engineering, Xiamen University, Xiamen 361005, P. R. China

‡ Authors contributed equally.

\* Corresponding author E-mail: wangxin01@tyut.edu.cn (X. Wang); wengqh@hnu.edu.cn (Q. Weng)

Tpy was synthesized using a three-step method. Firstly, compound 1 and compound 2 were synthesized, and their structures were proved by NMR. Then compound 1 and compound 2 were used as precursors to synthesize Tpy ligand, whose structure was demonstrated by NMR, MALDI-TOF-MS and FT-IR spectroscopies.

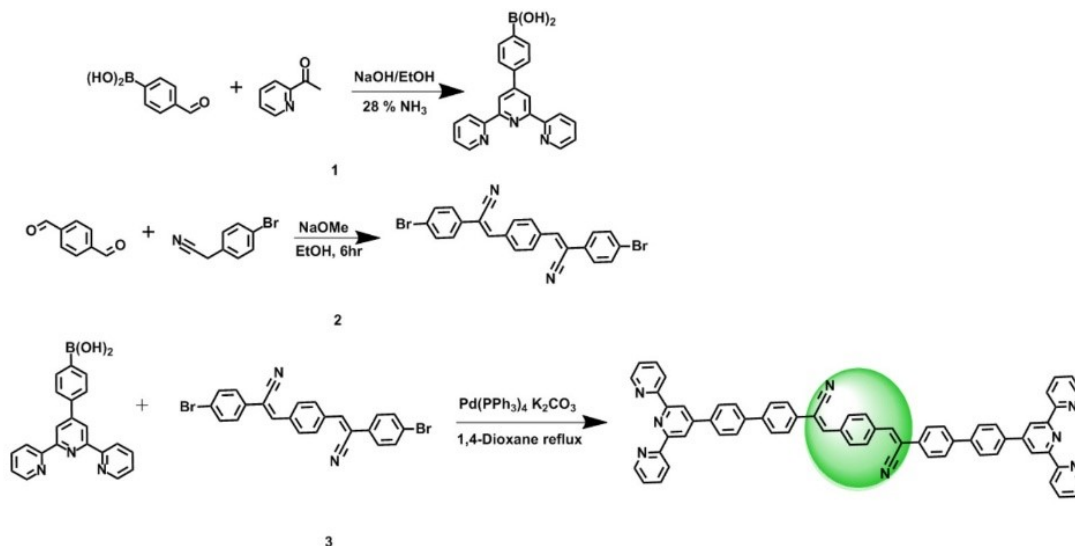

**Scheme S1** Illustrative synthetic route of Tpy.

Compound 1:  $^1\text{H}$  NMR (400 MHz, MeOD)  $\delta$  8.68 (d,  $J$  = 3.7 Hz, 2H), 8.65 (s, 2H), 8.61 (d,  $J$  = 7.9 Hz, 2H), 7.98 (t,  $J$  = 7.6 Hz, 3H), 7.78 (d,  $J$  = 6.9 Hz, 2H), 7.74 (d,  $J$  = 6.9 Hz, 2H), 7.46 (t,  $J$  = 5.6 Hz, 2H).

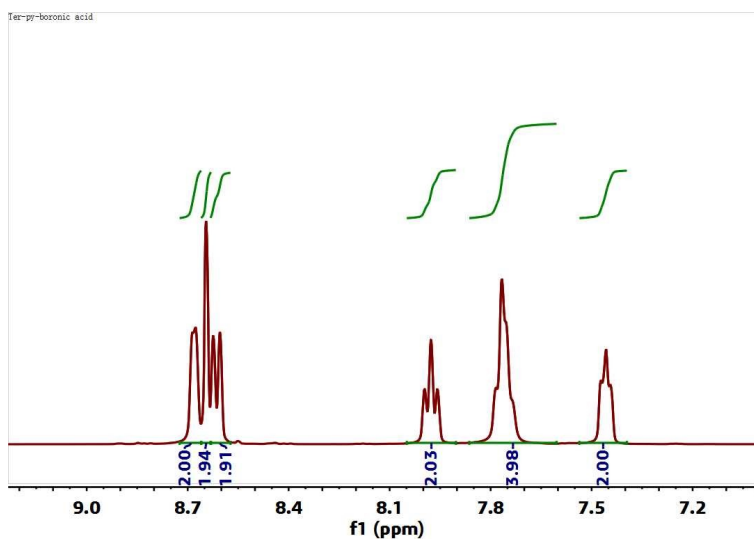

**Fig. S1**  $^1\text{H}$  NMR of compound 1

Compound 2:  $^1\text{H NMR}$  (400 MHz,  $\text{CDCl}_3$ )  $\delta$  8.00 (s, 4H), 7.61 (d,  $J = 8.3$  Hz, 4H), 7.58 (d,  $J = 8.3$  Hz, 4H), 7.54 (s, 2H).

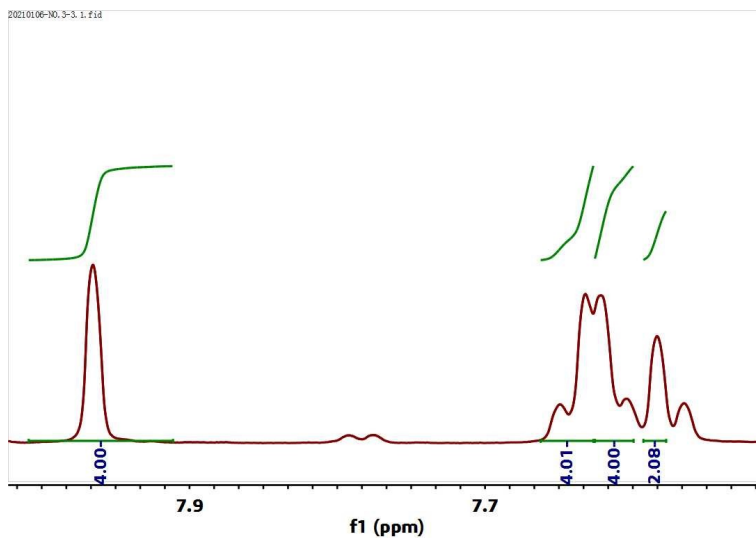

**Fig. S2**  $^1\text{H NMR}$  of compound 2.

Tpy:  $^1\text{H NMR}$  (400 MHz, TFA)  $\delta$  9.29 (d,  $J = 5.1$  Hz, 4H), 9.10 (d,  $J = 8.0$  Hz, 4H), 9.05 – 8.95 (m, 8H), 8.39 (t,  $J = 6.1$  Hz, 4H), 8.15 (d,  $J = 9.3$  Hz, 8H), 8.08 (d,  $J = 7.5$  Hz, 4H), 7.97 (s, 2H), 7.96 (s, 8H).

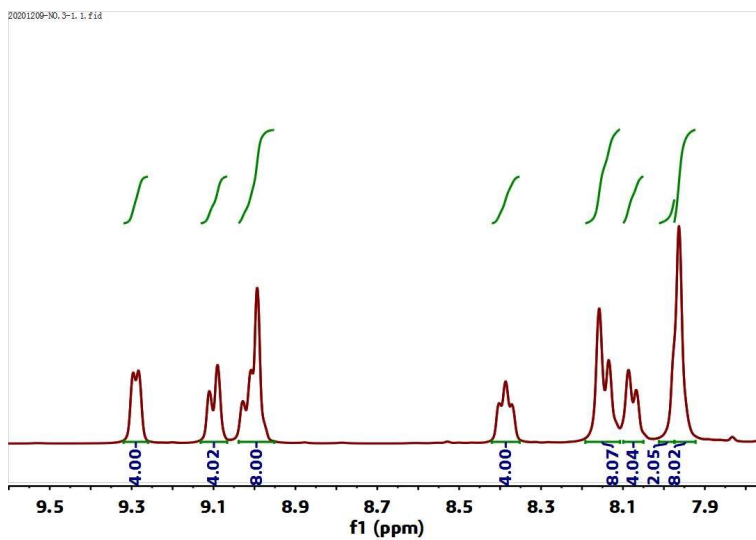

**Fig. S3**  $^1\text{H NMR}$  of Tpy.

MALDI-TOF-MS of Tpy:  $[\text{M} + \text{H}]^+$  calcd for  $\text{C}_{66}\text{H}_{42}\text{N}_8$ , 947.36; found, 947.35.

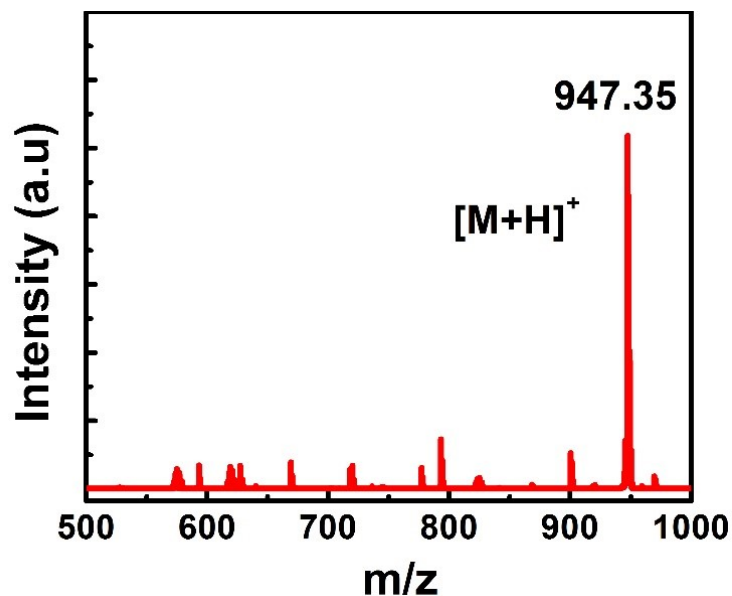

Fig. S4 MALDI-TOF-MS of Tpy

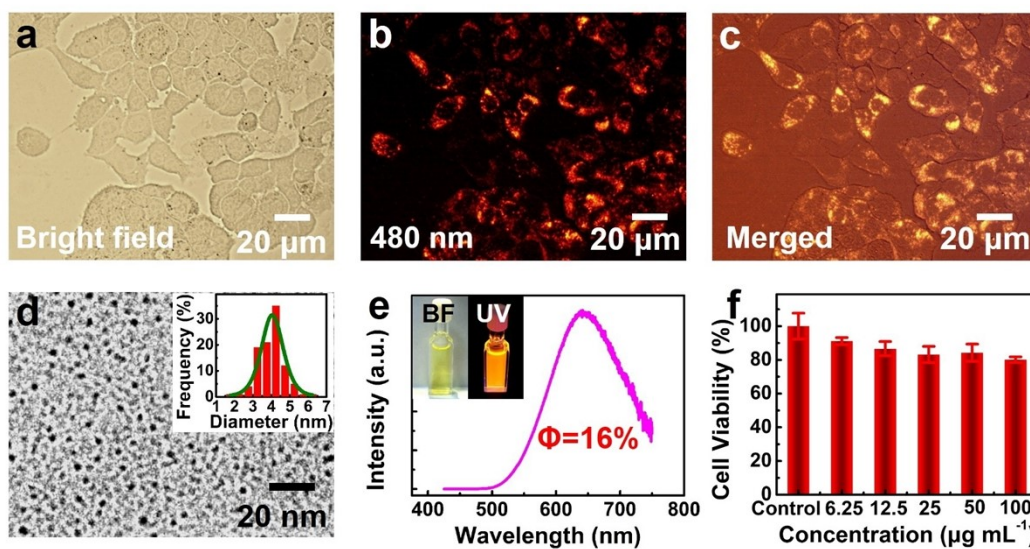

**Fig. S5** Live cell imaging of Zn-Tpy CONASH NPs and cytotoxicity assay. (a) Bright-field microscopic, (b) corresponding fluorescence images under light irradiation ( $\lambda_{\text{Ex}} = 480 \text{ nm}$ ) and (c) the merged images of the 4T1 cells labelled with the CONASH NPs. (d) TEM image of Zn-Tpy CONASH NPs. The inset is the particle size distribution of Zn-Tpy NPs. (e) Photoluminescence spectra of Zn-Tpy NPs in water. Inset: the fluorescence image of Zn-Tpy NPs dispersed in water. (f) CCK-8 assay of 4T1 cells incubated with the sample for 24 h.

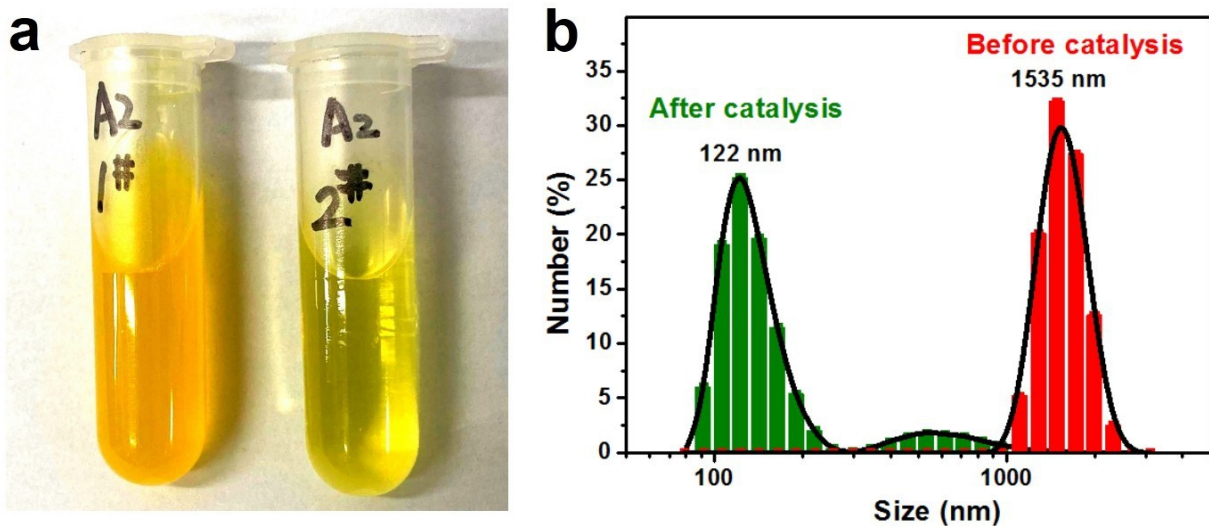

**Fig. S6** (a) Photograph of the Zn-Tpy solution before (left) and after (right) cyclic photocatalysis test. (b) DLS analysis of Zn-Tpy samples before and after cyclic photocatalysis test.

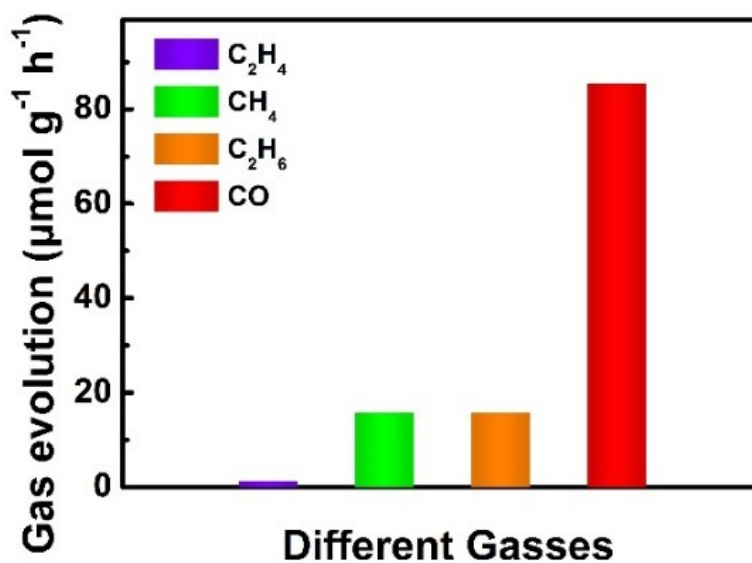

**Fig. S7** Photocatalytic evolution activities of different fuels with the saturation of  $\text{CO}_2$ . The evolution activities of  $\text{C}_2\text{H}_4$ ,  $\text{CH}_4$ ,  $\text{C}_2\text{H}_6$ , and  $\text{CO}$  were 1.21, 15.73, 15.71 and 85.39  $\mu\text{mol g}^{-1} \text{h}^{-1}$ , respectively.

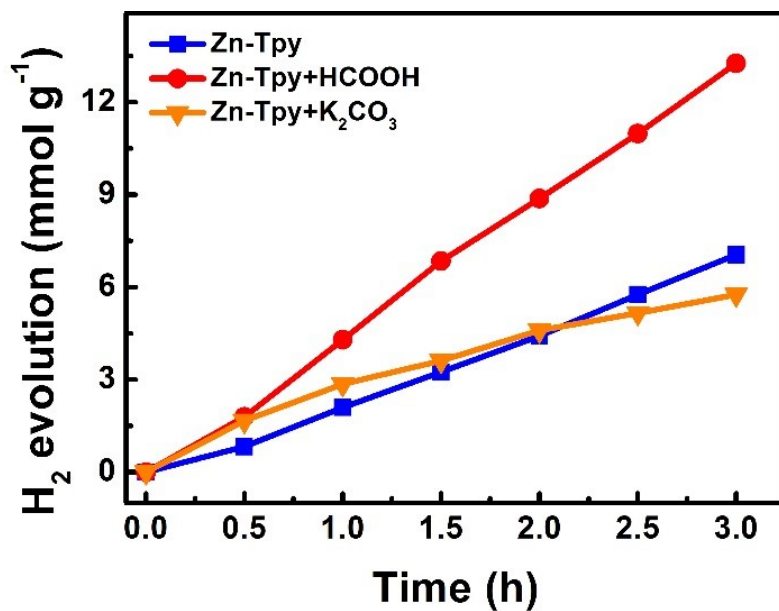

Fig. S8 Comparison of photocatalytic H<sub>2</sub> evolution under different conditions.

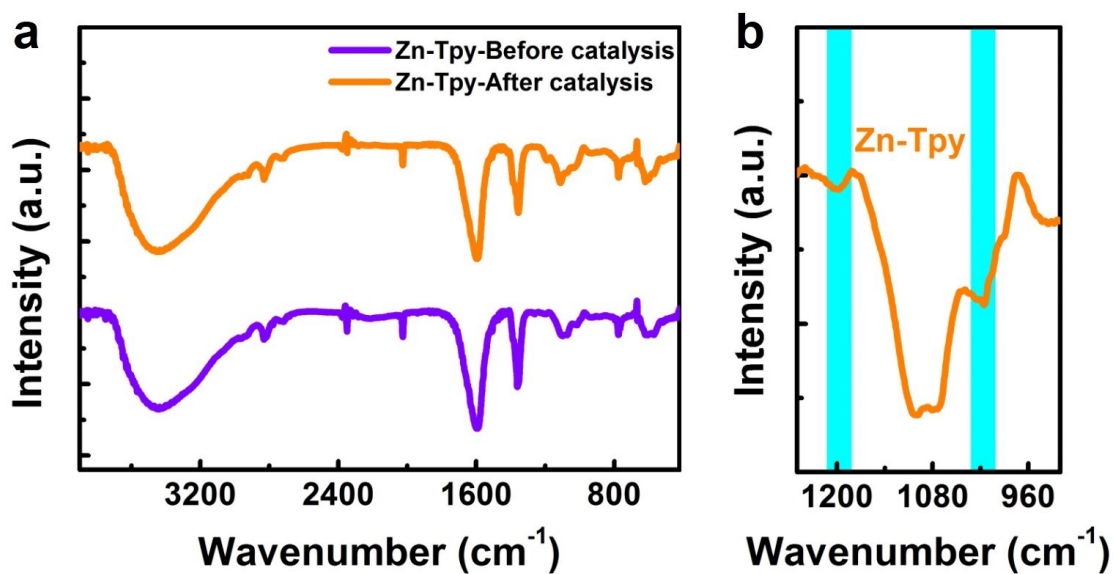

Fig. S9 (a) FT-IR spectra of Zn-Tpy before and after catalysis. (b) The peak of SO<sub>4</sub><sup>2-</sup> in the FT-IR spectra. The changes of FTIR spectra of Zn-Tpy before and after catalysis are almost neglectable, indicating that Zn-Tpy has excellent stability as a photocatalyst. FTIR (KBr, 1/ $\nu_{\max}$ ): 3441, 2923, 2831, 2716, 2349, 2282, 2025, 1595, 1355, 1195, 1114, 1014, 775, 667, 614 cm<sup>-1</sup>.

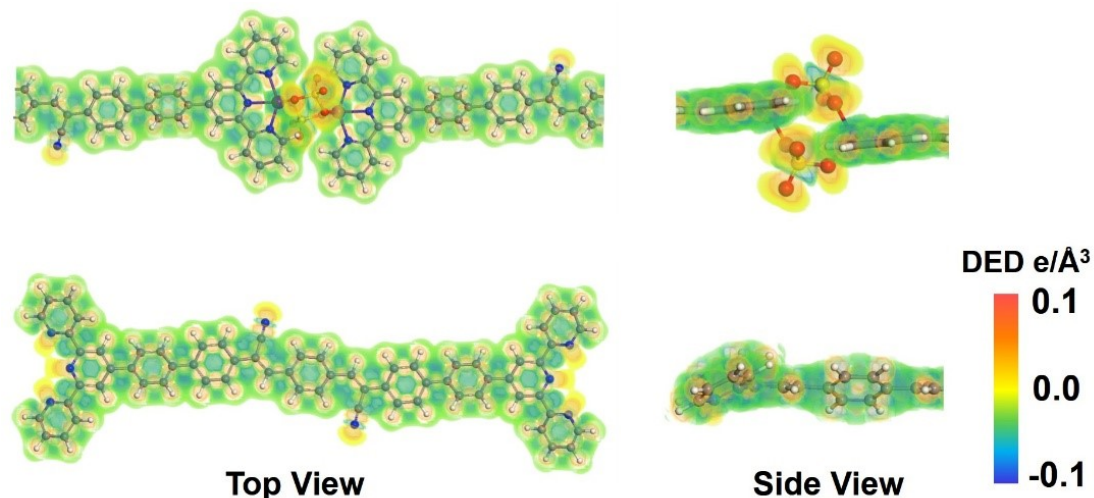

**Fig. S10** Deformation electron density maps of the Zn-Tpy and Tpy.

**Table S1** Comparison of the photocatalytic hydrogen production activities of non-noble metal-organic compounds.

| No. | Catalyst                                                          | H <sub>2</sub> production<br>( $\mu\text{mol g}^{-1} \text{h}^{-1}$ ) | Light source                                                                         | References       |
|-----|-------------------------------------------------------------------|-----------------------------------------------------------------------|--------------------------------------------------------------------------------------|------------------|
| 1   | Zn-Tpy CONASH                                                     | 3100                                                                  | 300 W Xe lamp: visible range                                                         | <b>This work</b> |
| 2   | Zn-Tpy CONASH-CO <sub>2</sub>                                     | 11800                                                                 | 300 W Xe lamp: visible range                                                         | <b>This work</b> |
| 3   | Thiazolo thiazole-COF (TpDTz) <sup>+</sup> Ni-cluster co-catalyst | 941                                                                   | 300 W Xe lamp: AM1.5                                                                 | 1                |
| 4   | Zn-TPY-TTF CPG                                                    | 530                                                                   | 300 W Xe lamp: visible range                                                         | 2                |
| 5   | CdS/Ni-MOF                                                        | 2508                                                                  | 300 W Xe lamp ( $\lambda > 420 \text{ nm}$ )                                         | 3                |
| 6   | Small-sized Ni NPs anchored in MOF                                | 3022                                                                  | 300 W Xe lamp visible range                                                          | 4                |
| 7   | ZIF-8/g-C <sub>3</sub> N <sub>4</sub>                             | 309.5                                                                 | 300 W Xe lamp ( $\lambda > 420 \text{ nm}$ )                                         | 5                |
| 8   | Ti-MOF-NH <sub>2</sub>                                            | 170                                                                   | 300 W Xe lamp: visible range                                                         | 6                |
| 9   | ZnO/ZnS-30 in MOF-5                                               | 435                                                                   | 300 W Xe lamp ( $\lambda > 420 \text{ nm}$ )                                         | 7                |
| 10  | N <sub>2</sub> -COF/chloro(pyridine) cobaloxime co-catalyst       | 782                                                                   | 300 W Xe lamp: AM1.5                                                                 | 8                |
| 11  | TPA-Zn                                                            | 3011.1                                                                | 290 MW Xenon lamp (420–750 nm)                                                       | 9                |
| 12  | Ir-complex (P1)/Co(bpy) <sub>3</sub> Cl <sub>2</sub>              | 598                                                                   | 300 W Xe lamp visible range                                                          | 10               |
| 13  | Bp-COP and BpZn-COP                                               | 1333                                                                  | 300 W Xe-lamp ( $\lambda > 420 \text{ nm}$ )                                         | 11               |
| 14  | Coordination polymers Co-CP                                       | 1778                                                                  | white LED lamp ( $\lambda = 420\text{--}780 \text{ nm}$ , $100 \text{ mW cm}^{-2}$ ) | 12               |
| 15  | Co(II)@MIL-125-NH <sub>2</sub>                                    | 553                                                                   | 300 W Xe lamp ( $\lambda > 380 \text{ nm}$ )                                         | 13               |
| 16  | Cd-TBAPy                                                          | 86                                                                    | 300 W Xe lamp ( $\lambda > 420 \text{ nm}$ )                                         | 14               |
| 17  | 40-P-CdS/Ni-MOLs                                                  | 29810                                                                 | 300 W Xe lamp ( $\lambda > 420 \text{ nm}$ )                                         | 15               |



**Table S2** Photocatalytic hydrogen production activity of noble metal-doped metal-organic materials

| No. | Catalyst                                                             | H <sub>2</sub> production (μmol g <sup>-1</sup> h <sup>-1</sup> ) | Light source                 | References |
|-----|----------------------------------------------------------------------|-------------------------------------------------------------------|------------------------------|------------|
| 1   | Pt@UiO-66-NH <sub>2</sub>                                            | 257.4                                                             | 300 W Xe lamp: visible range | 16         |
| 2   | 1.5 wt.% Pt/Ti-MOF-NH <sub>2</sub>                                   | 500                                                               | 300 W Xe lamp: visible range | 6          |
| 3   | Pt@CdS@Cd(II)-MOF@TiO <sub>2</sub> in Cd-MOF                         | 1416                                                              | 300 W Xe lamp: visible range | 17         |
| 4   | Calix arene based dye-sensitized Pt@UiO-66-NH <sub>2</sub>           | 1528                                                              | 300 W Xe lamp (λ >420 nm)    | 18         |
| 5   | Pt(4.38 wt%)/CuII-MOF                                                | 2510                                                              | 300 W Xe lamp (350-780 nm)   | 19         |
| 6   | PtSA-MNS                                                             | 11320                                                             | 300 W Xe lamp (λ >420 nm)    | 20         |
| 7   | Pt@Zn-TPY-TTF CPG                                                    | 14765                                                             | 300 W Xe lamp: visible range | 2          |
| 8   | Au@CdS/MIL-101                                                       | 25000                                                             | 300 W Xe lamp (λ >420 nm)    | 21         |
| 9   | Au nanodots@thiol-UiO-66@ZnIn <sub>2</sub> S <sub>4</sub> nanosheets | 39100.6                                                           | 300 W Xe lamp: visible range | 22         |
| 10  | Pt complex immobilized MOF-253                                       | 58000                                                             | 300 W Xe lamp (λ >420 nm)    | 23         |

## Reference

- 1 B. P. Biswal, H. A. Vignolo-González, T. Banerjee, L. Grunenber, G. k. Savasci, K. Gottschling, J. r. Nuss, C. Ochsenfeld and B. V. Lotsch, *J. Am. Chem. Soc.*, 2019, **141**, 11082-11092.
- 2 P. Verma, A. Singh, F. A. Rahimi, P. Sarkar, S. Nath, S. K. Pati and T. K. Maji, *Nat. Commun.*, 2021, **12**, 7313.
- 3 J. Guo, Y. Liang, L. Liu, J. Hu, H. Wang, W. An and W. Cui, *Appl. Surf. Sci.*, 2020, **522**, 146356.
- 4 W. Zhen, J. Ma and G. Lu, *Appl. Catal., B*, 2016, **190**, 12-25.
- 5 L. Tian, X. Yang, Q. Liu, F. Qu and H. Tang, *Appl. Surf. Sci.*, 2018, **455**, 403-409.
- 6 T. Toyao, M. Saito, Y. Horiuchi, K. Mochizuki, M. Iwata, H. Higashimura and M. Matsuoka, *Catal. Sci. Technol.*, 2013, **3**, 2092-2097.
- 7 X. Zhao, J. Feng, J. Liu, J. Lu, W. Shi, G. Yang, G. Wang, P. Feng and P. Cheng, *Adv. Sci.*, 2018, **5**, 1700590.
- 8 T. Banerjee, F. Haase, G. k. Savasci, K. Gottschling, C. Ochsenfeld and B. V. Lotsch, *J. Am. Chem. Soc.*, 2017, **139**, 16228-16234.
- 9 D. Samanta, M. Kumar, S. Singh, P. Verma, K. K. Kar, T. K. Maji and M. K. Ghorai, *J. Mater. Chem. A*, 2020, **8**, 21968-21972.
- 10 J.-G. Cai, Z.-T. Yu, Y.-J. Yuan, F. Li and Z.-G. Zou, *ACS Catal.*, 2014, **4**, 1953-1963.
- 11 J. Chen, X. Tao, L. Tao, H. Li, C. Li, X. Wang, C. Li, R. Li and Q. Yang, *Appl. Catal., B*, 2019, **241**, 461-470.



- 12 M.-J. Wei, J.-H. Zhang, W.-M. Liao, Z.-W. Wei, M. Pan and C.-Y. Su, *J. Photochem. Photobiol., A*, 2020, **387**, 112137.
- 13 Z. Li, J.-D. Xiao and H.-L. Jiang, *ACS Catal.*, 2016, **6**, 5359-5365.
- 14 Y. Xiao, Y. Qi, X. Wang, X. Wang, F. Zhang and C. Li, *Adv. Mater.*, 2018, **30**, 1803401.
- 15 W. Yang, M. Xu, K.-Y. Tao, J.-H. Zhang, D.-C. Zhong and T.-B. Lu, *Small*, 2022, **18**, 2200332.
- 16 J. D. Xiao, Q. Shang, Y. Xiong, Q. Zhang, Y. Luo, S. H. Yu and H. L. Jiang, *Angew. Chem. Int. Ed.*, 2016, **55**, 9389-9393.
- 17 C.-W. Zhao, Y.-A. Li, X.-R. Wang, G.-J. Chen, Q.-K. Liu, J.-P. Ma and Y.-B. Dong, *Chem. Commun.*, 2015, **51**, 15906-15909.
- 18 Y.-F. Chen, L.-L. Tan, J.-M. Liu, S. Qin, Z.-Q. Xie, J.-F. Huang, Y.-W. Xu, L.-M. Xiao and C.-Y. Su, *Appl. Catal., B*, 2017, **206**, 426-433.
- 19 L. Li, Y. Zhao, Q. Wang, Z.-Y. Liu, X.-G. Wang, E.-C. Yang and X.-J. Zhao, *Inorg. Chem. Front.*, 2021, **8**, 3556-3565.
- 20 Q. Zuo, T. Liu, C. Chen, Y. Ji, X. Gong, Y. Mai and Y. Zhou, *Angew. Chem. Int. Ed.*, 2019, **58**, 10198-10203.
- 21 Y. Wang, Y. Zhang, Z. Jiang, G. Jiang, Z. Zhao, Q. Wu, Y. Liu, Q. Xu, A. Duan and C. Xu, *Appl. Catal., B*, 2016, **185**, 307-314.
- 22 S. Mao, J.-W. Shi, G. Sun, D. Ma, C. He, Z. Pu, K. Song and Y. Cheng, *Appl. Catal., B*, 2021, **282**, 119550.
- 23 T. Zhou, Y. Du, A. Borgna, J. Hong, Y. Wang, J. Han, W. Zhang and R. Xu, *Energy Environ. Sci.*, 2013, **6**, 3229-3234.
